# Supplementary material for: Quantitative N-Glycan Profiling of Therapeutic Monoclonal Antibodies Performed by Middle-Up Level HILIC-HRMS Analysis
Source: MDPI journal article supplement (doi:10.3390/pharmaceutics13111744), 2021-10-20
Supplement: s1 [file s1]

# Supplementary Materials: Quantitative Middle-Up Level Analysis Using HILIC-HRMS for N-Glycan Profiling of Therapeutic Monoclonal Antibodies

Bastiaan L. Duivelshof, Steffy Denorme, Koen Sandra, Matthew A. Lauber, Xiaoxiao Liu, Alain Beck and Davy Guillarme, Valentina D'Atri

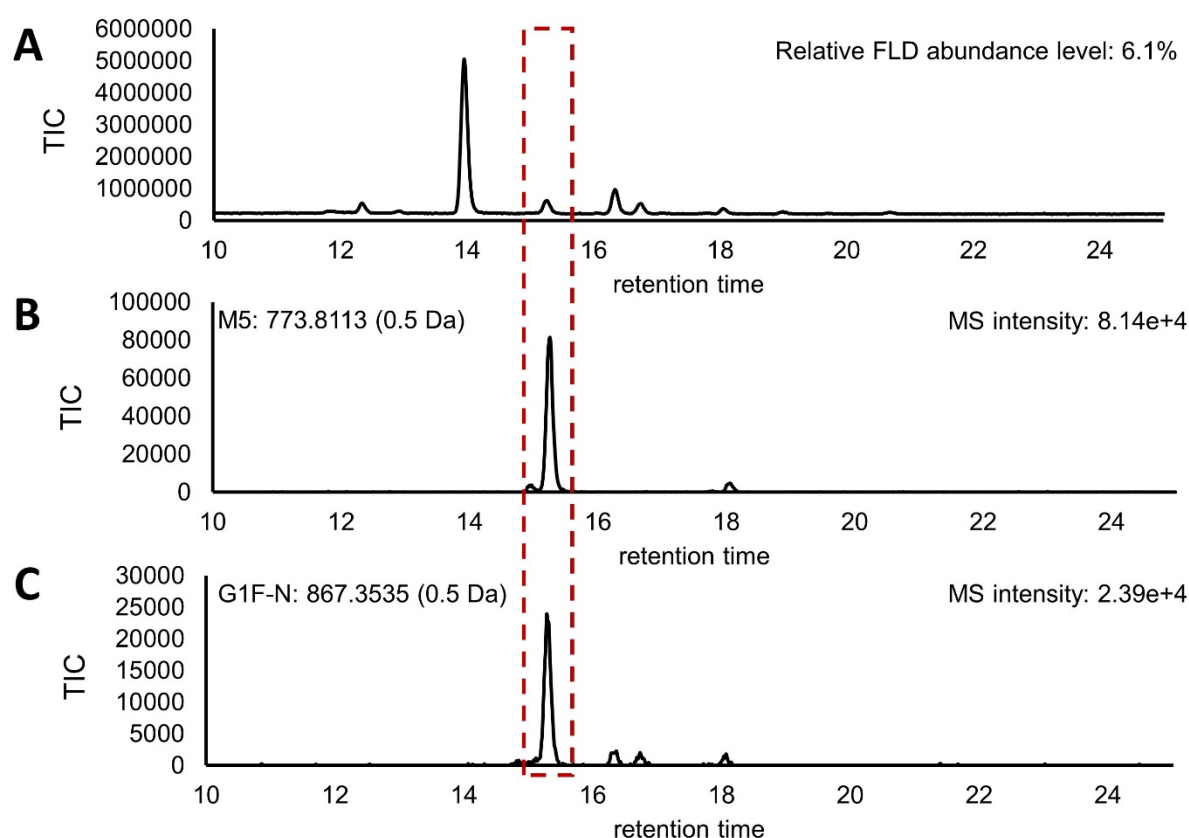

**Figure S1.** Correction of the FLD relative abundance level of co-eluting glycoforms after RFMS labelling and HILIC-FLD-MS analysis. (A) TIC profile of the RFMS labelled glycans of adalimumab with the relative FLD abundance level of the peak corresponding to the co-eluted M5 and G1F-N glycoforms (red box). (B) Extracted ion chromatogram (XIC) of the M5 glycan and corresponding MS intensity. (C) XIC of the G1F-N glycan and corresponding MS intensity.

**Table S1.** HILIC-MS analysis of *IdeS* digested and DTT reduced adalimumab. Peak retention times and mass assignment. –Kclip stands for C-terminal lysine clipping (–128 Da). + Gly stand for glycation (+ 162 Da).

| rt (min) | Trivial assignment | Theoretical masses (Da) | Experimental masses (Da) | $\Delta m$ (Da) | ppm   |
|----------|--------------------|-------------------------|--------------------------|-----------------|-------|
| 3.34     | Fd                 | 25454.25                | 25453.32                 | 0.93            | 36.55 |
| 4.76     | LC                 | 23407.82                | 23406.96                 | 0.86            | 36.77 |
| 5.16     | LC + Gly           | 23569.82                | 23569.23                 | 0.59            | 25.06 |
| 5.53     | scFc-Kclip G0      | 25053.74                | 25052.54                 | 1.20            | 47.73 |
| 5.53     | scFc-Kclip G0F-N   | 24996.68                | 24995.83                 | 0.85            | 34.18 |
| 5.68     | scFc -Kclip G0F    | 25199.88                | 25199.09                 | 0.79            | 31.23 |
| 5.88     | scFc -Kclip M5     | 24971.63                | 24970.72                 | 0.91            | 36.52 |
| 6.10     | scFc -Kclip G1F    | 25362.02                | 25360.97                 | 1.05            | 41.30 |
| 6.34     | scFc-Kclip M6      | 25133.77                | 25132.72                 | 1.05            | 41.88 |
| 6.59     | scFc -Kclip G2F    | 25524.16                | 25523.73                 | 0.43            | 16.77 |
| 6.79     | scFc-Kclip M7      | 25295.91                | 25294.01                 | 1.90            | 75.23 |

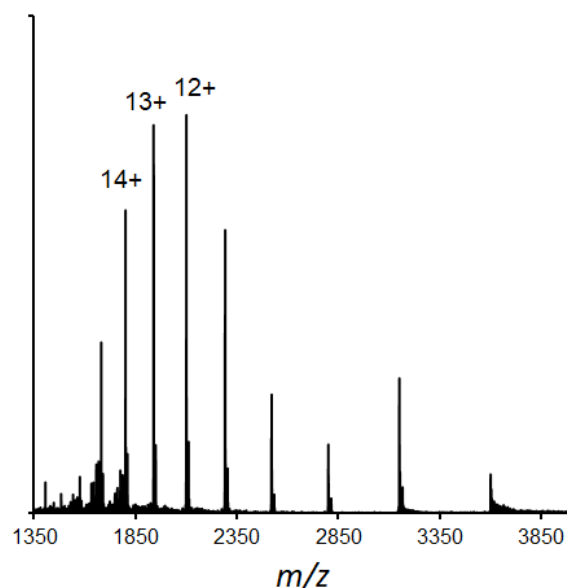

**Figure S2.** Charge state distribution of the scFc + G0F subunit in HILIC-MS. Mass spectra of the peak corresponding to the scFc +G0F subunit of adalimumab.

**Table S2.** Relative glycan quantification of benralizumab on subunit level using the extracted ion chromatogram (XIC). Retention times and relative abundance levels (in %, with standard deviation) are determined based on the integrated XIC profiles (n = 3). –Kclip stands for C-terminal lysine clipping.

| Component name  | Observed RT (min) | Response  | Relative abundance | STDEV |
|-----------------|-------------------|-----------|--------------------|-------|
| scFc-Kclip G0   | 5.40              | 945156.00 | 84.28              | 0.33  |
| scFc-Kclip G1   | 5.82              | 100994.00 | 9.01               | 0.14  |
| scFc-Kclip M5   | 5.80              | 30013.33  | 2.67               | 0.19  |
| scFc-Kclip G0-N | 5.24              | 24232.33  | 2.16               | 0.05  |
| scFc-Kclip G1-N | 5.40              | 18981.33  | 1.69               | 0.10  |
| scFc-Kclip G2   | 6.29              | 2172.00   | 0.19               | 0.01  |

**Table S3.** Relative glycan quantification of obinituzumab on subunit level using the extracted ion chromatogram (XIC). Retention times and relative abundance levels (in %, with standard deviation) are determined based on the integrated XIC profiles (n = 3).

| Component name           | Observed RT (min) | Response  | Relative abundance | STDEV |
|--------------------------|-------------------|-----------|--------------------|-------|
| scFc G0FB                | 5.86              | 260917.67 | 25.01              | 0.59  |
| scFc G0B                 | 5.68              | 228549.67 | 21.93              | 0.15  |
| scFc G1FB                | 6.20              | 120582.33 | 11.56              | 0.43  |
| scFc G2                  | 6.24              | 102676.67 | 9.85               | 0.48  |
| scFc G1                  | 5.83              | 68350.67  | 6.54               | 0.40  |
| scFc G1B                 | 6.02              | 67878.67  | 6.53               | 0.57  |
| scFc G0                  | 5.49              | 43485.00  | 4.17               | 0.07  |
| scFc G0F                 | 5.68              | 38302.33  | 3.67               | 0.14  |
| scFc M5                  | 5.81              | 36283.00  | 3.48               | 0.07  |
| scFc G1F                 | 6.07              | 34325.67  | 3.30               | 0.14  |
| scFc G2F                 | 6.44              | 23639.33  | 2.27               | 0.21  |
| scFc G2B                 | 6.20              | 17477.00  | 1.67               | 0.31  |
| <b>Bisecting glycans</b> |                   |           | 66.71              |       |
| <b>Afucosylation</b>     |                   |           | 50.71              |       |

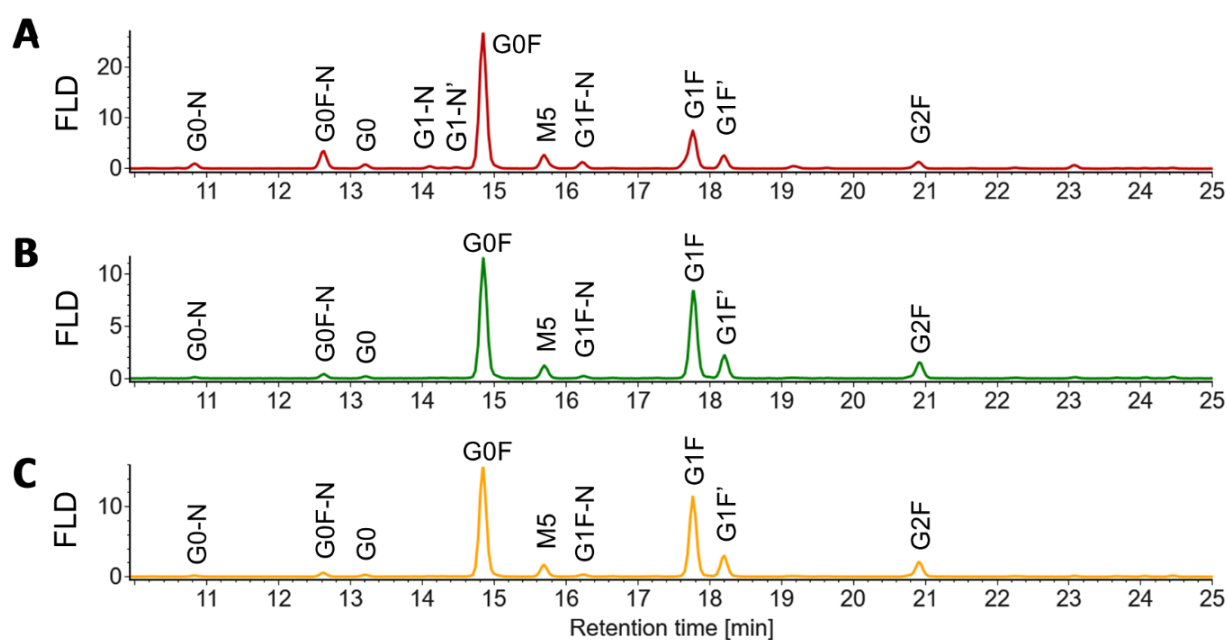

**Figure S3.** 2-AB labelled glycan profiles of infliximab products in HILIC-FLD-MS. Fluorescence chromatograms of the N-glycan profile of Remicade® (A), Remsima® (B) and Inflectra® (C).

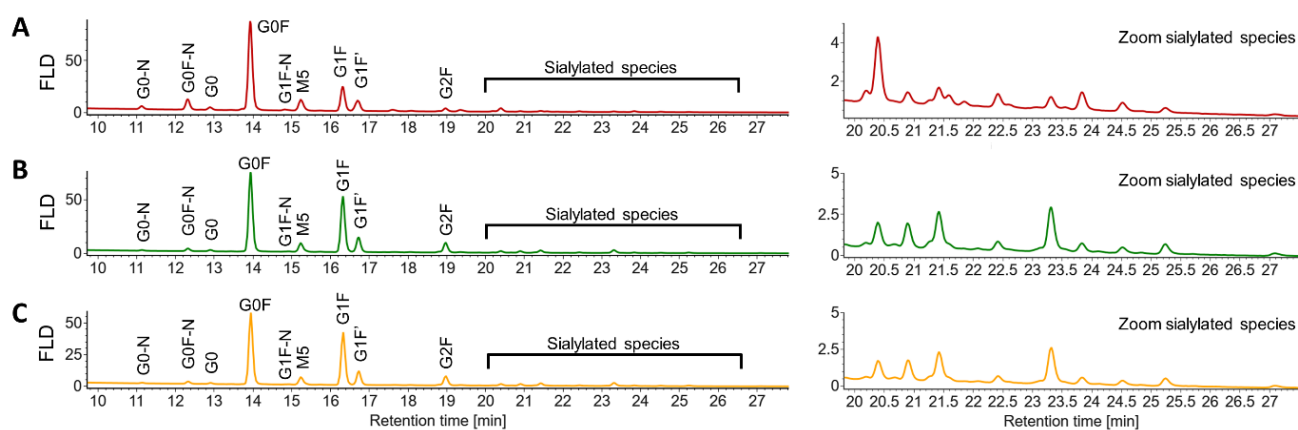

**Figure S4.** RFMS labelled glycan profiles of infliximab products in HILIC-FLD-MS. Fluorescence chromatograms of the N-glycan profile of Remicade® (A), Remsima® (B) and Inflectra® (C).
